# Supplementary material for: Controls on the hydraulic geometry of alluvial channels: bank stability to gravitational failure, the critical-flow hypothesis, and conservation of mass and energy
Source: Copernicus journal article supplement (doi:10.5194/esurf-9-379-2021), 2021-04-26
Supplement: Supplementary file 1 [file esurf-9-379-2021-supplement.zip]

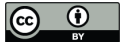

## *Supplement of*

# **Controls on the hydraulic geometry of alluvial channels: bank stability to gravitational failure, the critical-flow hypothesis, and conservation of mass and energy**

**Jon D. Pelletier**

*Correspondence to:* Jon D. Pelletier ([jdpellet@email.arizona.edu](mailto:jdpellet@email.arizona.edu))

- [esurf-9-379-2021-supplement-title-page.pdf](#)
- [predicted\\_and\\_observed\\_bankfull\\_depth.xlsx](#)
- [readme.txt](#)
- [supplementaryfigures.pdf](#)
- [usclayavfp10.txt](#)

The copyright of individual parts of the supplement might differ from the article licence.
